# Supplementary material for: Coal-Derived Humic Substances: Insight into Chemical Structure Parameters and Biomedical Properties
Source: MDPI journal article supplement (doi:10.3390/molecules29071530), 2024-03-29
Supplement: s1 [file s1]

Table S1- Body weight (g) of female rats after single intragastric administration of the studied HS sample at a dose of 2000 mg/kg (X±SE)

| Experimental Groups | Day 1 (pre-administration) | Day 8       | Day 15      |
|---------------------|----------------------------|-------------|-------------|
| Control (n=3)       | 286,40±7,60                | 290,10±9,30 | 291,00±7,20 |
| Coal HS (n=3)       | 291,30±4,80                | 294,00±4,40 | 300,50±3,30 |

Table S2 – Body mass (g) of rats during a 28-day course administration of the studied HS sample at a dose of 1000 mg/kg body weight and subsequent post-cancellation period (X±SE)

| Day                        | Control group (n=10) | Coal HS administration for 28 days (n=10) | Post-cancellation period (43 days) (n=5) |
|----------------------------|----------------------|-------------------------------------------|------------------------------------------|
| Male rats                  |                      |                                           |                                          |
| Day 1 (pre-administration) | 464,40±11,00         | 465,10±10,30                              | 463,20±17,70                             |
| Day 8                      | 467,30±10,70         | 468,90±10,30                              | 466,40±17,80                             |
| Day 15                     | 482,50±10,00         | 485,30±8,90                               | 483,20±17,00                             |
| Day 22                     | 504,00±10,50         | 506,10±9,10                               | 501,60±17,50                             |
| Day 29                     | 522,90±9,80          | 525,80±9,80                               | 519,20±17,40                             |
| Day 36                     | -                    | -                                         | 539,20±16,20                             |
| Day 43                     | -                    | -                                         | 554,40±16,20                             |
| Female rats                |                      |                                           |                                          |
| Day 1 (pre-administration) | 260,50±4,20          | 264,00±4,10                               | 263,00±6,30                              |
| Day 8                      | 263,10±4,10          | 266,90±4,00                               | 266,00±5,60                              |
| Day 15                     | 267,70±4,20          | 270,80±3,60                               | 270,00±5,80                              |
| Day 22                     | 277,30±4,60          | 281,20±3,40                               | 280,80±6,80                              |
| Day 29                     | 284,60±4,10          | 289,40±3,60                               | 286,80±6,50                              |
| Day 36                     | -                    | -                                         | 297,20±5,40                              |
| Day 43                     | -                    | -                                         | 306,60±7,30                              |

Table S3 – Mass of feed consumed (g) by rats during a course of 28-day administration of the studied HS sample at a dose of 1000 mg/kg, and subsequent post-cancellation period ( $\bar{X} \pm SE$ )

| Day         | Control group<br>(n=10) | Coal HS administration for<br>28 days<br>(n=10) | Post-cancellation period (43 days)<br>(n=5) |
|-------------|-------------------------|-------------------------------------------------|---------------------------------------------|
| Male rats   |                         |                                                 |                                             |
| Day 8       | 21,30±0,90              | 20,30±1,10                                      | 22,10±0,90                                  |
| Day 15      | 20,10±1,00              | 21,30±1,10                                      | 19,80±1,50                                  |
| Day 22      | 22,00±0,90              | 23,40±1,09                                      | 21,30±1,80                                  |
| Day 29      | 23,20±0,80              | 21,90±0,60                                      | 22,90±1,30                                  |
| Day 36      | -                       | -                                               | 24,40±1,90                                  |
| Day 42      | -                       | -                                               | 24,10±1,90                                  |
| Female rats |                         |                                                 |                                             |
| Day 8       | 40,5±3,6                | 39,3±2,7                                        | 39,8±4,1                                    |
| Day 15      | 39,3±2,7                | 40,9±3,4                                        | 39,0±6,3                                    |
| Day 22      | 41,5±2,9                | 42,0±3,4                                        | 42,2±5,2                                    |
| Day 29      | 41,9±4,7                | 40,9±5,8                                        | 39,6±4,1                                    |
| Day 36      | -                       | -                                               | 41,0±5,8                                    |
| Day 42      | -                       | -                                               | 39,2±7,2                                    |

Table S4 – Volume of water consumption (mL) by rats during a course of 28-day administration of the studied HS sample at a dose of 1000 mg/kg, and subsequent post-cancellation period (X±SE)

| Day         | Control group<br>(n=10) | Coal HS<br>administration<br>for 28 days<br>(n=10) | Post-cancellation<br>period (43 days)<br>(n=5) |
|-------------|-------------------------|----------------------------------------------------|------------------------------------------------|
| Male rats   |                         |                                                    |                                                |
| Day 8       | 17,40±1,90              | 19,10±1,00                                         | 18,60±1,30                                     |
| Day 15      | 17,20±0,60              | 17,40±0,50                                         | 18,10±0,60                                     |
| Day 22      | 16,80±0,80              | 16,10±0,50                                         | 17,50±0,30                                     |
| Day 29      | 17,30±0,70              | 16,70±0,50                                         | 17,40±0,80                                     |
| Day 36      | -                       | -                                                  | 17,80±0,60                                     |
| Day 42      | -                       | -                                                  | 18,50±1,40                                     |
| Female rats |                         |                                                    |                                                |
| Day 8       | 35,5±3,6                | 35,9±1,2                                           | 34,8±4,1                                       |
| Day 15      | 38,1±3,9                | 38,7±6,2                                           | 39,4±2,1                                       |
| Day 22      | 39,1±4,2                | 38,6±3,5                                           | 37,8±2,3                                       |
| Day 29      | 36,8±2,4                | 36,6±3,5                                           | 38,4±2,1                                       |
| Day 36      | -                       | -                                                  | 37,8±2,1                                       |
| Day 42      | -                       | -                                                  | 35,6±1,2                                       |

Table S5 – Parameters of clinical laboratory blood analysis in rats during a course of 28-day administration of the studied HS sample at a dose of 1000 mg/kg, and subsequent post-cancellation period ( $\bar{X} \pm SE$ )

| Indicator                                             |                    | Control group<br>(n=10) | Coal HS administration |                                                |
|-------------------------------------------------------|--------------------|-------------------------|------------------------|------------------------------------------------|
|                                                       |                    |                         | For 29 days (n=10)     | Post-cancellation<br>period (43 days)<br>(n=5) |
| Male rats                                             |                    |                         |                        |                                                |
| Hemoglobin, g/L                                       |                    | 219,7±5,6               | 206,2±5,7              | 220,2±5,5                                      |
| Erythrocytes, 10 <sup>12</sup> /L                     |                    | 9,8±0,2                 | 9,5±0,2                | 9,7±0,2                                        |
| MCH (mean corpuscular hemoglobin), pg                 |                    | 22,3±0,2                | 23,8±1,2               | 22,8±0,4                                       |
| MCHC (mean corpuscular hemoglobin concentration), g/L |                    | 441,7±2,1               | 436,8±4,2              | 438,6±4,0                                      |
| Hematocrit, %                                         |                    | 49,7±1,2                | 47,1±1,1               | 50,2±1,2                                       |
| Platelets, 10 <sup>9</sup> /L                         |                    | 947,6±63,6              | 925,2±84,0             | 944,8±109,7                                    |
| Total leukocyte count, 10 <sup>9</sup> /L             |                    | 13,62±0,8               | 12,9±0,8               | 12,4±1,0                                       |
| Granulocytes                                          | 10 <sup>9</sup> /L | 3,6±0,5                 | 4,0±0,6                | 3,5±0,9                                        |
|                                                       | %                  | 25,7±2,8                | 29,6±3,6               | 27,6±5,4                                       |
| Lymphocytes                                           | 10 <sup>9</sup> /L | 9,6±0,6                 | 8,4±0,4                | 8,5±0,7                                        |
|                                                       | %                  | 70,8±2,8                | 66,5±3,7               | 69,5±5,6                                       |
| Monocytes                                             | 10 <sup>9</sup> /L | 0,47±0,03               | 0,50±0,04              | 0,38±0,08                                      |
|                                                       | %                  | 3,5±0,2                 | 3,9±0,3                | 3,0±0,4                                        |
| Female rats                                           |                    |                         |                        |                                                |
| Hemoglobin, g/L                                       |                    | 195,6±5,1               | 188,3±5,6              | 215,8±8,6                                      |
| Erythrocytes, 10 <sup>12</sup> /L                     |                    | 8,4±0,2                 | 8,8±0,2                | 8,4±1,0                                        |
| MCH (mean corpuscular hemoglobin), pg                 |                    | 23,2±0,1                | 21,5±1,0               | 23,5±0,3                                       |
| MCHC (mean corpuscular hemoglobin concentration), g/L |                    | 440,8±1,9               | 405,9±19,2             | 442,8±2,0                                      |
| Hematocrit, %                                         |                    | 44,3±1,1                | 46,9±1,4               | 48,7±2,0                                       |
| Platelets, 10 <sup>9</sup> /L                         |                    | 984,0±89,9              | 979,7±92,6             | 978,0±158,8                                    |
| Total leukocyte count, 10 <sup>9</sup> /L             |                    | 10,2±0,8                | 9,8±0,7                | 9,8±1,7                                        |
| Granulocytes                                          | 10 <sup>9</sup> /L | 2,5±0,4                 | 2,6±0,5                | 2,7±0,6                                        |
|                                                       | %                  | 25,5±3,9                | 26,6±3,4               | 27,5±2,5                                       |
| Lymphocytes                                           | 10 <sup>9</sup> /L | 7,4±0,8                 | 6,9±0,6                | 6,8±1,1                                        |
|                                                       | %                  | 74,9±4,0                | 70,8±3,5               | 69,8±2,6                                       |
| Monocytes                                             | 10 <sup>9</sup> /L | 0,24±0,04               | 0,24±0,03              | 0,26±0,04                                      |
|                                                       | %                  | 2,6±0,5                 | 2,5±0,3                | 2,7±0,2                                        |

Table S6 – Biochemical parameters of rat serum during a course of 28-day administration of the studied HS sample at a dose of 1000 mg/kg, and subsequent post-cancellation period (X±SE)

| Indicator                             | Control group<br>(n=10) | Coal HS administration |                                                |
|---------------------------------------|-------------------------|------------------------|------------------------------------------------|
|                                       |                         | For 29 days (n=10)     | Post-cancellation<br>period (43 days)<br>(n=5) |
| Male rats                             |                         |                        |                                                |
| ALT (Alanine Aminotransferase), U/L   | 49,40±1,90              | 45,90±2,20             | 57,20±7,70                                     |
| AST (Aspartate Aminotransferase), U/L | 123,70±4,70             | 127,00±5,50            | 129,80±7,00                                    |
| ALP (Alkaline Phosphatase), U/L       | 133,00±6,90             | 126,80±7,30            | 125,20±14,20                                   |
| Glucose, mmol/L                       | 4,80±0,23               | 5,30±0,25              | 4,38±0,21                                      |
| Urea, mmol/L                          | 4,69±0,18               | 4,37±0,12              | 4,92±0,43                                      |
| Creatinine, µmol/L                    | 46,26±1,80              | 48,22±2,62             | 49,38±1,54                                     |
| Total Protein, g/L                    | 70,90±1,40              | 70,20±1,50             | 72,80±1,90                                     |
| Albumin, g/L                          | 31,50±1,10              | 32,40±0,50             | 34,20±1,20                                     |
| Globulin, g/L                         | 39,40±1,80              | 37,80±1,50             | 38,60±2,50                                     |
| Albumin/Globulin Ratio                | 0,82±0,06               | 0,87±0,05              | 0,90±0,07                                      |
| Cholesterol, mmol/L                   | 1,73±0,08               | 1,76±0,09              | 1,98±0,16                                      |
| Triglycerides, mmol/L                 | 0,87±1,33               | 0,89±0,18              | 0,88±0,16                                      |
| Total Bilirubin, µmol/L               | 2,31±0,12               | 2,51±0,12              | 2,40±0,17                                      |
| Direct Bilirubin, µmol/L              | 1,54±0,06               | 1,58±0,05              | 1,68±0,18                                      |
| Phosphorus, mmol/L                    | 2,64±0,09               | 2,63±0,04              | 2,50±0,08                                      |
| Sodium, mmol/L                        | 141,20±1,90             | 142,50±2,40            | 144,40±3,40                                    |
| Potassium, mmol/L                     | 6,16±0,16               | 6,50±0,14              | 5,94±0,17                                      |
| Calcium, mmol/L                       | 3,00±0,08               | 3,03±0,04              | 2,91±0,03                                      |
| Chloride, mmol/L                      | 96,50±1,60              | 99,30±1,20             | 99,80±2,60                                     |
| Female rats                           |                         |                        |                                                |
| ALT (Alanine Aminotransferase), U/L   | 62,20±5,50              | 53,30±2,90             | 52,40±1,70                                     |
| AST (Aspartate Aminotransferase), U/L | 125,00±10,60            | 132,80±9,20            | 136,60±12,40                                   |
| ALP (Alkaline Phosphatase), U/L       | 126,00±11,00            | 120,80±4,80            | 118,60±11,00                                   |
| Glucose, mmol/L                       | 5,07±0,28               | 5,72±0,14              | 4,92±0,51                                      |
| Urea, mmol/L                          | 4,88±0,25               | 5,70±0,47              | 5,30±0,35                                      |
| Creatinine, µmol/L                    | 44,13±0,75              | 46,62±1,19             | 45,30±1,36                                     |
| Total Protein, g/L                    | 70,70±1,30              | 71,80±1,90             | 72,00±2,10                                     |
| Albumin, g/L                          | 33,80±0,50              | 34,80±1,20             | 34,20±2,30                                     |
| Globulin, g/L                         | 36,90±1,20              | 37,00±1,10             | 37,80±1,00                                     |
| Albumin/Globulin Ratio                | 0,92±0,03               | 0,95±0,03              | 0,91±0,07                                      |
| Cholesterol, mmol/L                   | 1,97±0,10               | 2,05±0,12              | 1,92±0,06                                      |
| Triglycerides, mmol/L                 | 0,71±0,06               | 0,88±0,10              | 0,84±0,07                                      |
| Total Bilirubin, µmol/L               | 2,60±0,11               | 2,77±0,11              | 2,84±0,17                                      |
| Direct Bilirubin, µmol/L              | 1,72±0,08               | 1,68±0,08              | 1,70±0,19                                      |
| Phosphorus, mmol/L                    | 2,35±0,13               | 2,49±0,06              | 2,60±0,08                                      |
| Sodium, mmol/L                        | 137,80±1,40             | 140,50±4,20            | 139,60±5,00                                    |
| Potassium, mmol/L                     | 5,78±0,24               | 6,04±0,11              | 6,30±0,26                                      |
| Calcium, mmol/L                       | 2,76±0,03               | 2,88±0,10              | 2,84±0,07                                      |
| Chloride, mmol/L                      | 98,90±1,70              | 103,10±1,40            | 97,40±2,60                                     |

Table S7 – Indicators of renal metabolism in rats during a course of 28-day administration of the studied HS sample at a dose of 1000 mg/kg, and subsequent post-cancellation period (X±SE)

| Indicator              | Control group<br>(n=10) | Coal HS administration |                                             |
|------------------------|-------------------------|------------------------|---------------------------------------------|
|                        |                         | For 29 days (n=10)     | Post-cancellation<br>period (43 days) (n=5) |
| Male rats              |                         |                        |                                             |
| Daily volume, mL       | 8,8±1,8                 | 9,4±2,1                | 8,6±2,4                                     |
| Specific gravity       | 1,0220±0,0011           | 1,0225±0,0011          | 1,0220±0,0012                               |
| pH                     | 6,8±0,1                 | 6,9±0,1                | 6,7±0,3                                     |
| Glucose, mg/dL         | 0,0±0,0                 | 0,0±0,0                | 0,0±0,0                                     |
| Protein, mg/dL         | 0,060±0,025             | 0,030±0,020            | 0,030±0,030                                 |
| Occult blood, cells/μL | 0,0±0,0                 | 0,0±0,0                | 0,0±0,0                                     |
| Bilirubin, μmol/L      | 0,0±0,0                 | 0,0±0,0                | 0,0±0,0                                     |
| Urobilinogen, μmol/L   | 0,0±0,0                 | 0,0±0,0                | 0,0±0,0                                     |
| Nitrites               | 0,0±0,0                 | 0,0±0,0                | 0,0±0,0                                     |
| Leukocytes, cells/μL   | 0,0±0,0                 | 0,0±0,0                | 0,0±0,0                                     |
| Ketones, mg/dL         | 0,0±0,0                 | 0,0±0,0                | 0,0±0,0                                     |
| Female rats            |                         |                        |                                             |
| Daily volume, mL       | 7,3±1,2                 | 6,8±1,0                | 7,6±2,0                                     |
| Specific gravity       | 1,0225±0,0008           | 1,0220±0,0008          | 1,0210±0,0010                               |
| pH                     | 6,5±0,1                 | 6,8±0,1                | 6,9±0,2                                     |
| Glucose, mg/dL         | 0,0±0,0                 | 0,0±0,0                | 0,0±0,0                                     |
| Protein, mg/dL         | 0,060±0,025             | 0,045±0,023            | 0,030±0,030                                 |
| Occult blood, cells/μL | 0,0±0,0                 | 0,0±0,0                | 0,0±0,0                                     |
| Bilirubin, μmol/L      | 0,0±0,0                 | 0,0±0,0                | 0,0±0,0                                     |
| Urobilinogen, μmol/L   | 0,0±0,0                 | 0,0±0,0                | 0,0±0,0                                     |
| Nitrites               | 0,0±0,0                 | 0,0±0,0                | 0,0±0,0                                     |
| Leukocytes, cells/μL   | 0,0±0,0                 | 0,0±0,0                | 0,0±0,0                                     |
| Ketones, mg/dL         | 0,0±0,0                 | 0,0±0,0                | 0,0±0,0                                     |

Table S8 – Mass of internal organs in male rats during a course of 28-day administration of the studied HS sample at a dose of 1000 mg/kg, and subsequent post-cancellation period ( $\bar{X} \pm SE$ )

| Organ            | Control group<br>(n=10) | Coal HS administration |                                                |
|------------------|-------------------------|------------------------|------------------------------------------------|
|                  |                         | For 29 days (n=10)     | Post-cancellation<br>period (43 days)<br>(n=5) |
| Absolute mass, g |                         |                        |                                                |
| Liver            | 13,98±0,42              | 14,25±0,35             | 15,31±0,46                                     |
| Kidneys          | 3,16±0,05               | 3,26±0,06              | 3,37±0,20                                      |
| Testes           | 2,50±0,13               | 4,43±0,05              | 4,44±0,14                                      |
| Lungs            | 2,23±0,10               | 2,25±0,08              | 2,50±0,13                                      |
| Brain            | 1,96±0,07               | 2,04±0,03              | 2,25±0,12                                      |
| Heart            | 1,51±0,05               | 1,60±0,04              | 1,64±0,06                                      |
| Spleen           | 0,951±0,052             | 1,001±0,055            | 1,113±0,104                                    |
| Thymus           | 0,510±0,038             | 0,489±0,028            | 0,558±0,051                                    |
| Adrenal glands   | 0,090±0,005             | 0,093±0,003            | 0,100±0,005                                    |
| Total body mass  | 522,90±9,80             | 525,80±9,80            | 554,40±16,20                                   |
| Relative mass, % |                         |                        |                                                |
| Liver            | 3,02±0,06               | 2,93±0,05              | 2,77±0,12                                      |
| Kidneys          | 0,68±0,02               | 0,67±0,01              | 0,61±0,03                                      |
| Testes           | 0,95±0,04               | 0,91±0,01              | 0,81±0,05                                      |
| Lungs            | 0,48±0,02               | 0,46±0,02              | 0,45±0,02                                      |
| Brain            | 0,42±0,01               | 0,42±0,01              | 0,40±0,01                                      |
| Heart            | 0,33±0,01               | 0,33±0,00              | 0,30±0,02                                      |
| Spleen           | 0,20±0,01               | 0,21±0,01              | 0,20±0,02                                      |
| Thymus           | 0,11±0,01               | 0,10±0,01              | 0,10±0,01                                      |
| Adrenal glands   | 0,02±0,00               | 0,02±0,00              | 0,02±0,00                                      |

Table S9 – Mass of internal organs in female rats during a course of 28-day administration of the studied HS sample at a dose of 1000 mg/kg, and subsequent post-cancellation period (X±SE)

| Organ            | Control group<br>(n=10) | Coal HS administration |                                                |
|------------------|-------------------------|------------------------|------------------------------------------------|
|                  |                         | For 29 days (n=10)     | Post-cancellation<br>period (43 days)<br>(n=5) |
| Absolute mass, g |                         |                        |                                                |
| Liver            | 8,91±0,36               | 9,26±0,35              | 10,12±0,27                                     |
| Kidneys          | 1,87±0,05               | 1,90±0,06              | 2,05±0,14                                      |
| Brain            | 1,78±0,05               | 1,75±0,06              | 1,89±0,04                                      |
| Lungs            | 1,56±0,08               | 1,59±0,07              | 1,76±0,11                                      |
| Heart            | 0,93±0,03               | 0,96±0,04              | 1,01±0,03                                      |
| Spleen           | 0,684±0,074             | 0,725±0,025            | 0,921±0,129                                    |
| Thymus           | 0,432±0,023             | 0,443±0,024            | 0,488±0,048                                    |
| Ovaries          | 0,134±0,014             | 0,143±0,024            | 0,164±0,018                                    |
| Adrenal glands   | 0,078±0,006             | 0,074±0,003            | 0,081±0,005                                    |
| Total body mass  | 284,60±4,10             | 289,40±3,60            | 306,60±7,30                                    |
| Relative mass, % |                         |                        |                                                |
| Liver            | 3,34±0,10               | 3,43±0,081             | 3,30±0,05                                      |
| Kidneys          | 0,71±0,01               | 0,72±0,01              | 0,67±0,05                                      |
| Brain            | 0,68±0,02               | 0,66±0,03              | 0,62±0,01                                      |
| Lungs            | 0,60±0,03               | 0,60±0,02              | 0,57±0,03                                      |
| Heart            | 0,35±0,01               | 0,36±0,01              | 0,33±0,01                                      |
| Spleen           | 0,26±0,03               | 0,27±0,01              | 0,30±0,05                                      |
| Thymus           | 0,16±0,01               | 0,17±0,01              | 0,16±0,01                                      |
| Ovaries          | 0,05±0,00               | 0,05±0,01              | 0,05±0,01                                      |
| Adrenal glands   | 0,03±0,00               | 0,03±0,00              | 0,03±0,00                                      |

Table S10 - Assessment of the impact of dermal applications of the studied HS sample on the condition of the skin of guinea pigs

| Experimental Groups                       | Number of dermal applications |     |
|-------------------------------------------|-------------------------------|-----|
|                                           | 10                            | 20  |
| Control, males (n=5)                      | (-)                           | (-) |
| Humic substances 125 mg/ml, males (n=5)   | (-)                           | (-) |
| Control, females (n=5)                    | (-)                           | (-) |
| Humic substances 125 mg/ml, females (n=5) | (-)                           | (-) |
